# Supplementary material for: Exposure to OPFRs Is Associated with Obesity and Dysregulated Serum Lipid Profiles: Data from 2017–2018 NHANES
Source: MDPI journal article supplement (doi:10.3390/metabo14020124), 2024-02-13
Supplement: s1 [file s1]

## Supplementary Figures

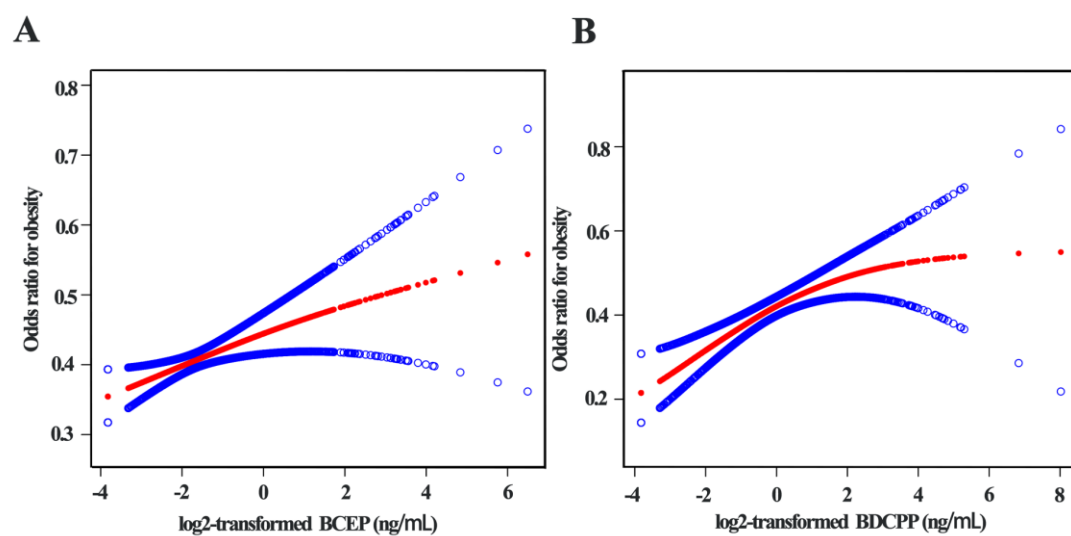

Figure S1. Association between log2-transformed BCEP (A) and BDCPP (B) concentrations and odds ratio for obesity.

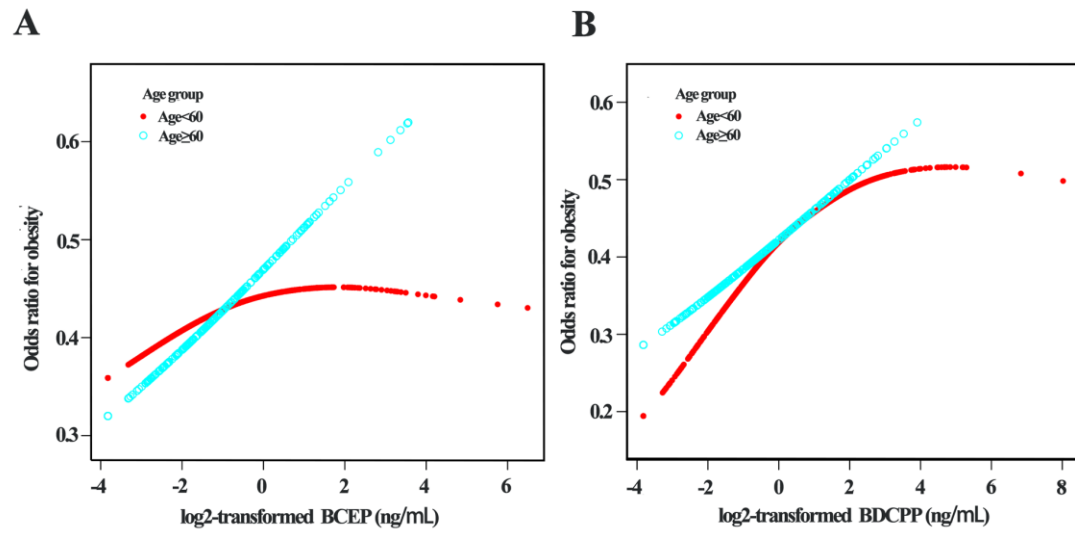

Figure S2. Association between log2-transformed BCEP (A) and BDCPP (B) and odds ratio for obesity stratified by age.

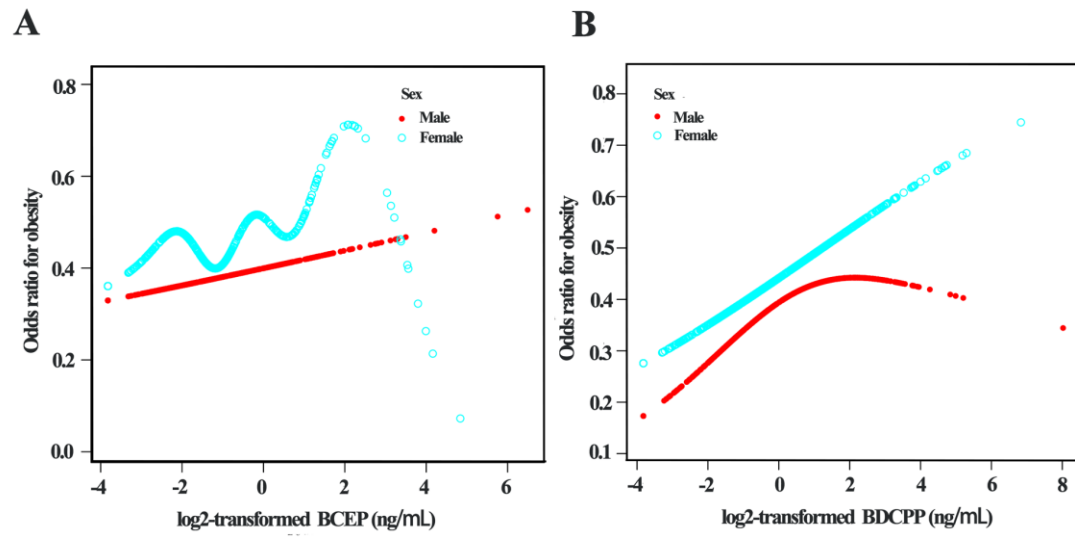

Figure S3. Association between log2-transformed BCEP (A) and BDCPP (B) and odds ratio for obesity stratified by sex.

**A**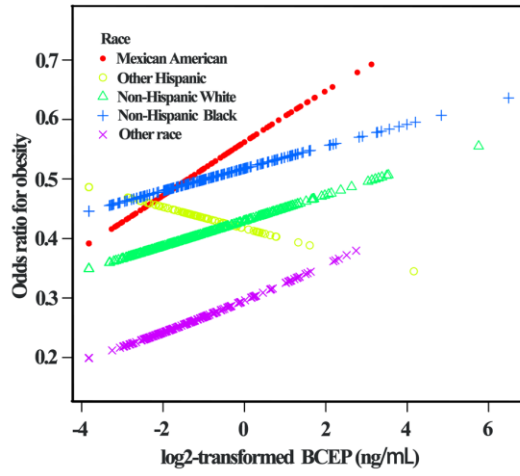**B**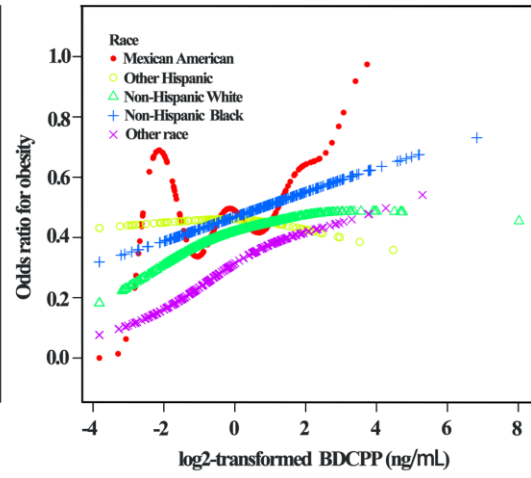

Figure S4. Association between log2-transformed BCEP (A) and BDCPP (B) and odds ratio for obesity stratified by race.

**A**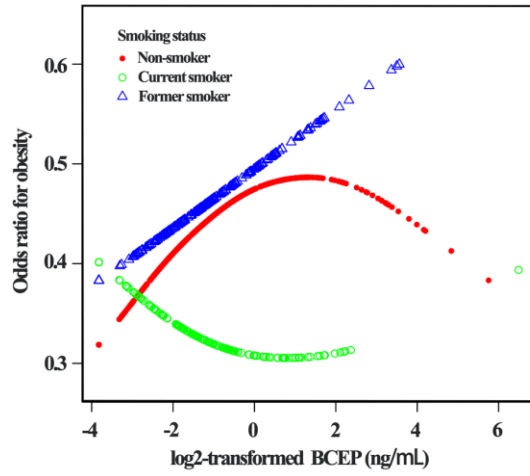**B**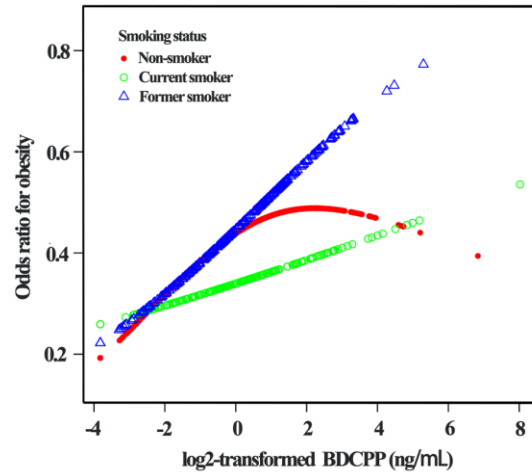

Figure S5. Association between log2-transformed BCEP (A) and BDCPP (B) and odds ratio for obesity stratified by smoking status.

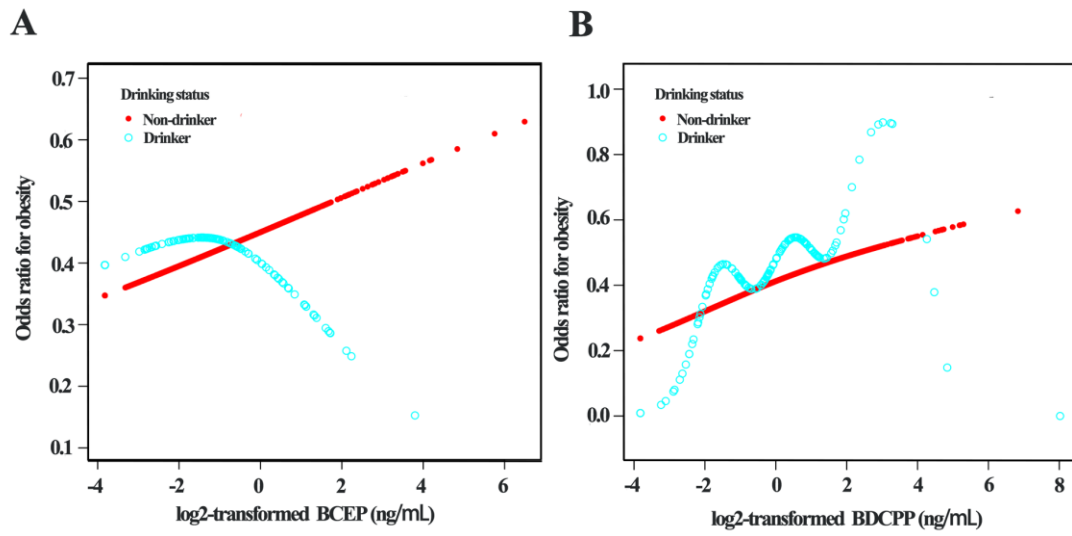

Figure S6. Association between log2-transformed BCEP (A) and BDCPP (B) and odds ratio for obesity stratified by drinking status.

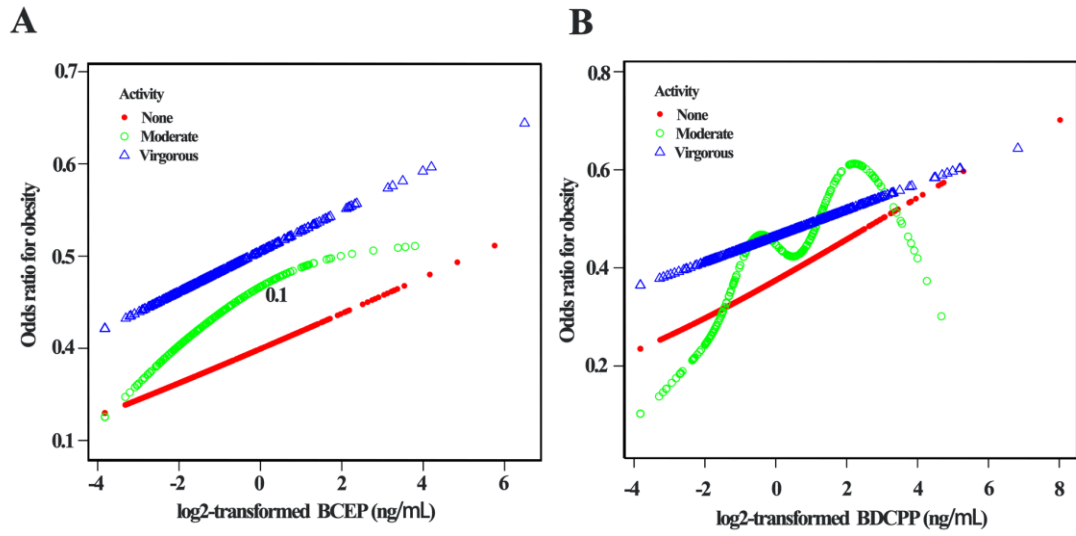

Figure S7. Association between log2-transformed BCEP (A) and BDCPP (B) and odds ratio for obesity stratified by physical activity.

**A**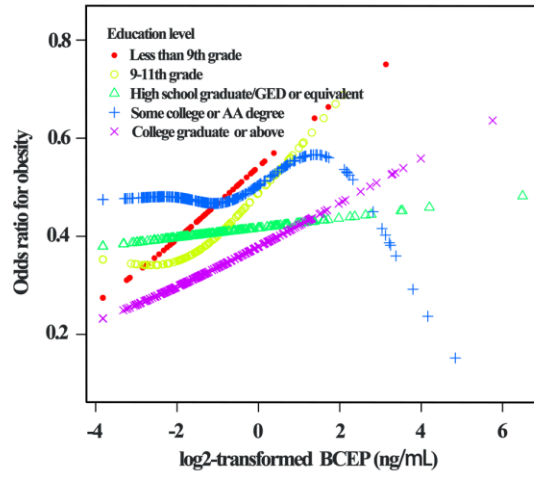**B**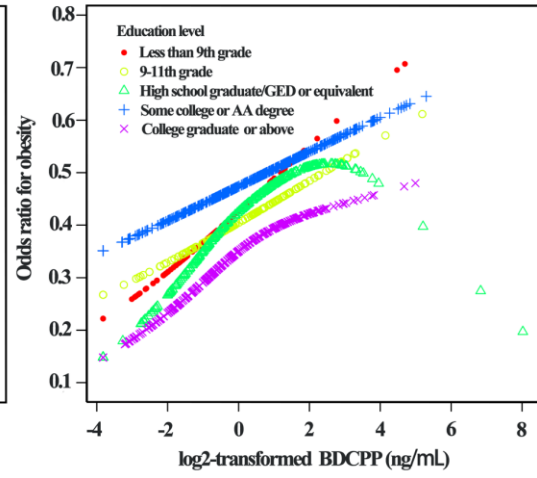

Figure S8. Association between log<sub>2</sub>-transformed BCEP (A) and BDCPP (B) and odds ratio for obesity stratified by educational level.

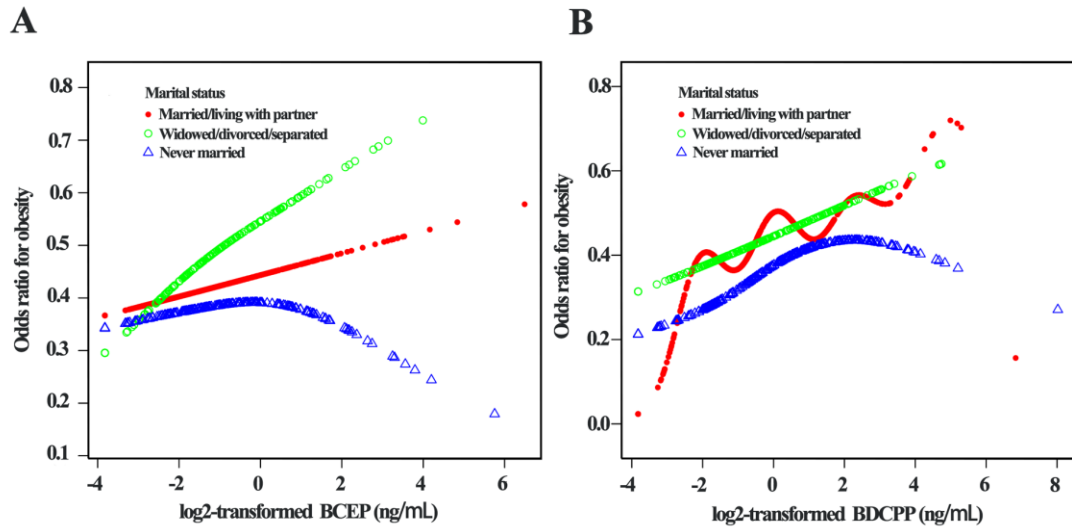

Figure S9. Association between log2-transformed BCEP (A) and BDCPP (B) and odds ratio for obesity stratified by marital status.

**A**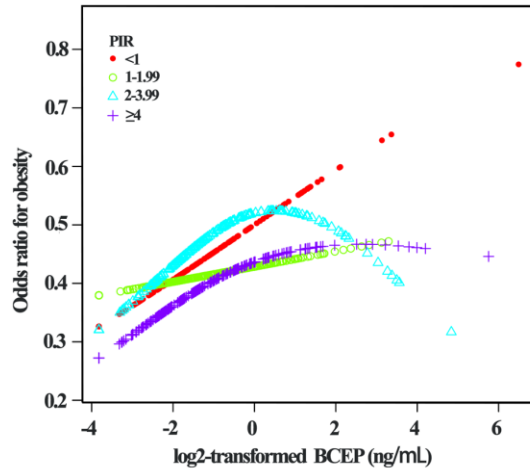**B**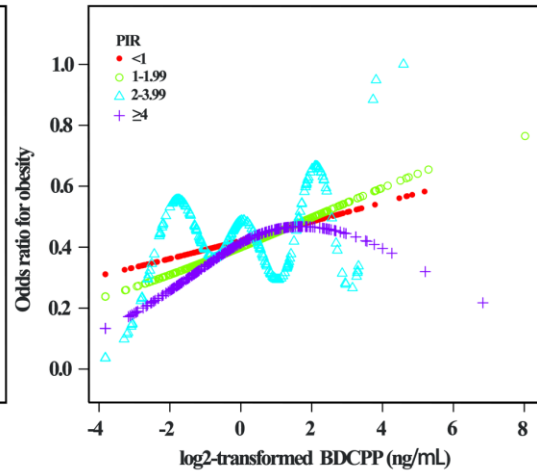

Figure S10. Association between log2-transformed BCEP (A) and BDCPP (B) and odds ratio for obesity stratified by family PIR.
