# Supplementary material for: Exposure to OPFRs Is Associated with Obesity and Dysregulated Serum Lipid Profiles: Data from 2017–2018 NHANES
Source: MDPI journal article supplement (doi:10.3390/metabo14020124), 2024-02-13
Supplement: s1 [file s1]

Table S1. BMI value of participants across different OPFR metabolites concentrations

| Variables | Q1         | Q2         | Q3          | Q4         | p value |
|-----------|------------|------------|-------------|------------|---------|
| BCIPP     | 30.05±9.48 | 30.12±7.90 | 30.60±8.37  | 29.79±7.72 | 0.283   |
| BCEP      | 29.11±6.50 | 29.09±8.58 | 30.67±9.35  | 30.18±8.16 | 0.211   |
| BDCPP     | 27.63±6.33 | 28.88±7.64 | 30.00±7.45  | 31.64±9.54 | <0.001  |
| DBUP      | 29.37±7.55 | 29.84±7.02 | 31.93±10.22 | 30.07±8.09 | 0.209   |
| DPHP      | 28.41±7.81 | 29.93±8.34 | 30.39±8.24  | 29.74±7.77 | 0.118   |

Table S2. Serum lipid profiles of participants across different OPFR metabolites concentrations

| Variables | Q1        | Q2         | Q3        | Q4        | P value |
|-----------|-----------|------------|-----------|-----------|---------|
| TG        |           |            |           |           |         |
| BCIPP     | 1.08±0.59 | 1.14±0.64  | 1.10±0.66 | 1.01±0.59 | 0.498   |
| BCEP      | 1.15±0.64 | 1.11±0.70  | 1.08±0.65 | 1.12±0.62 | 0.537   |
| BDCPP     | 1.14±0.71 | 1.20±0.72  | 1.08±0.55 | 1.01±0.63 | 0.021   |
| DBUP      | 1.21±0.70 | 1.14±0.65  | 0.95±0.55 | 1.15±0.69 | 0.061   |
| DPHP      | 1.26±0.74 | 1.10±0.56  | 1.09±1.65 | 0.97±0.59 | <0.001  |
| TC        |           |            |           |           |         |
| BCIPP     | 4.87±0.63 | 4.63±0.99  | 4.71±1.05 | 4.80±0.83 | 0.692   |
| BCEP      | 4.78±1.01 | 4.87±1.05  | 4.82±1.02 | 4.73±0.97 | 0.712   |
| BDCPP     | 5.01±1.15 | 4.97±1.1.3 | 4.78±0.98 | 4.63±0.88 | <0.001  |
| DBUP      | 4.86±0.84 | 4.77±0.98  | 4.49±1.03 | 4.90±1.07 | 0.602   |
| DPHP      | 5.13±1.14 | 4.86±1.07  | 4.17±0.95 | 4.66±0.95 | <0.001  |
| HDL-c     |           |            |           |           |         |
| BCIPP     | 1.37±0.30 | 1.30±0.32  | 1.31±0.38 | 1.44±0.47 | 0.322   |
| BCEP      | 1.36±0.41 | 1.43±0.46  | 1.37±0.35 | 1.36±0.45 | 0.207   |
| BDCPP     | 1.41±0.41 | 1.43±0.44  | 1.35±0.32 | 1.36±0.38 | 0.067   |
| DBUP      | 1.35±0.43 | 1.35±0.39  | 1.37±0.39 | 1.44±0.52 | 0.853   |
| DPHP      | 1.45±0.44 | 1.35±0.38  | 1.36±0.36 | 1.41±0.48 | 0.492   |
| LDL-c     |           |            |           |           |         |
| BCIPP     | 3.01±0.94 | 2.81±0.85  | 2.90±0.95 | 2.89±0.78 | 0.710   |
| BCEP      | 2.89±0.88 | 2.93±0.91  | 2.96±0.91 | 2.86±0.86 | 0.891   |
| BDCPP     | 3.05±1.03 | 3.00±0.99  | 2.93±0.84 | 2.80±0.80 | 0.227   |
| DBUP      | 2.96±0.92 | 2.90±0.96  | 2.68±0.96 | 2.93±0.78 | 0.094   |
| DPHP      | 3.10±1.01 | 3.01±1.01  | 2.84±0.84 | 2.81±0.77 | 0.028   |
